# Supplementary material for: Controllable intramolecular interaction of 3D arranged π-conjugated luminophores based on a POSS scaffold, leading to highly thermally-stable and emissive materials
Source: Royal Society of Chemistry journal article supplement (doi:10.1039/c6ra14971e), 2016-01-01
Supplement: c6ra14971e1.pdf [file c6ra14971e1.pdf]

## Electric Supplementary Information

### Controllable Intramolecular Interaction of 3D Arranged $\pi$ -Conjugated Luminophores Based on a POSS Scaffold, Leading to Highly Thermally-Stable and Emissive Materials

Masayuki Gon, Keita Sato, Kazuo Tanaka\* and Yoshiki Chujo\*

Department of Polymer Chemistry, Graduate School of Engineering, Kyoto University

Katsura, Nishikyo-ku, Kyoto 615-8510, Japan.

E-mail: kazuo123@chujo.synchem.kyoto-u.ac.jp; chujo@chujo.synchem.kyoto-u.ac.jp

#### Contents:

|                                                  |      |
|--------------------------------------------------|------|
| General                                          | S-2  |
| Materials                                        | S-3  |
| Synthetic procedures and characterization        | S-3  |
| Synthesis of <b>3</b> , <b>Ph3POSS</b>           | S-3  |
| Synthesis of <b>4</b> , <b>Ph3TMS</b>            | S-4  |
| Synthesis of <b>6</b> , <b><i>t</i>-BuPOSS</b>   | S-4  |
| Synthesis of <b>7</b> , <b><i>t</i>-BuTMS</b>    | S-5  |
| Synthesis of <b>9</b>                            | S-5  |
| Synthesis of <b>10</b>                           | S-6  |
| Synthesis of <b>11</b>                           | S-6  |
| Synthesis of <b>12</b>                           | S-7  |
| Synthesis of <b>13</b> , <b><i>i</i>-PrPOSS</b>  | S-7  |
| Synthesis of <b>14</b> , <b><i>i</i>-PrTMS</b>   | S-8  |
| NMR spectra                                      | S-9  |
| PL lifetime decay curves                         | S-22 |
| Diffuse reflection spectra                       | S-23 |
| Intermolecular interaction of model compounds    | S-23 |
| Figures of the thermal stability of luminescence | S-24 |
| TGA data under air                               | S-26 |
| References                                       | S-27 |

## General

$^1\text{H}$ ,  $^{13}\text{C}$  and  $^{29}\text{Si}$  NMR spectra were recorded on JEOL EX400 and AL400 instruments at 400, 100 and 80 MHz, respectively. Samples were analyzed in  $\text{CDCl}_3$ , and the chemical shift values were expressed relative to  $\text{Me}_4\text{Si}$  as an internal standard. Analytical thin layer chromatography (TLC) was performed with silica gel 60 Merck F254 plates. Column chromatography was performed with Wakogel C-300 silica gel. Automated flash chromatography was carried out on a YAMAZEN CORPORATION, YFLC AI-580 (Hi-Flash<sup>TM</sup> Column 2L). High-resolution mass spectra (HRMS) were obtained on a JEOL JMS-MS700 spectrometer for electron ionization (EI), a Thermo Fisher Scientific EXACTIVE spectrometer for atmospheric pressure chemical ionization (APCI) and Thermo Fisher Scientific OrbitrapXL spectrometers for matrix assisted laser desorption/ionization (MALDI) using 1,8-dihydroxy-9,10-dihydroanthracen-9-one (DIT) as a matrix. Recyclable preparative high-performance liquid chromatography (HPLC) was carried out on a Japan Analytical Industry Co. Ltd., Model LC918R (JAIGEL-1H and 2H columns) and LC9204 (JAIGEL-2.5H and 3H columns) using  $\text{CHCl}_3$  as an eluent. UV-vis absorption spectra were recorded on a SHIMADZU UV-3600 spectrophotometer, and samples were analyzed in  $\text{CHCl}_3$  at room temperature. Fluorescence emission spectra were recorded on a HORIBA JOBIN YVON Fluoromax-4 spectrofluorometer, and samples were analyzed at room temperature. The PL lifetime measurement was recorded on a Horiba FluoroCube spectrofluorometer system; excitation was carried out using a UV diode laser (NanoLED 292 nm). Thermogravimetric analysis (TGA) was recorded on a Seiko instrument inc. EXSTAR TG/DTA6000. Differential scanning calorimetry (DSC) was recorded on a Seiko instrument inc. EXSTAR DSC6220. Elemental analyses were performed at the Microanalytical Center of Kyoto University.

## Materials

Compounds **1**<sup>1</sup>, **2**<sup>2</sup>, **5**<sup>3</sup>, **8**<sup>4</sup> were synthesized according to the literatures. Trimethylsilylacetylene, ethynylbenzene, 1-bromo-4-(trimethylsilyl)benzene, bis(triphenylphosphine)palladium(II) dichloride (PdCl<sub>2</sub>(PPh<sub>3</sub>)<sub>2</sub>), tris(dibenzylideneacetone)dipalladium(0) (Pd<sub>2</sub>(dba)<sub>3</sub>), 1,1'-bis(diphenylphosphino)ferrocene (dppf) and NBu<sub>4</sub>F were purchased from Tokyo Chemical Industry Co., Ltd. and used without further purification. PPh<sub>3</sub>, CuI, Sodium nitrite, KI, CH<sub>3</sub>CN, MeOH, concentrated H<sub>2</sub>SO<sub>4</sub> and K<sub>2</sub>CO<sub>3</sub> were purchased from Wako Pure Chemical Industries and used without further purification. THF and Et<sub>3</sub>N were purchased from Wako Pure Chemical Industries and Kanto Chemical Co., Inc. and were purified using a two-column solid-state purification system (Glasscontour System, Joerg Meyer, Irvine, CA) under Ar pressure.

## Synthetic Procedures and Characterization

### Synthesis of octa(4-((4-(phenylethynyl)phenyl)ethynyl)phenyl)POSS

#### - **3**, Ph<sub>3</sub>POSS -

A mixture of **1** (496 mg, 2.45 mmol), **2** (500 mg, 0.245 mmol), Pd<sub>2</sub>(dba)<sub>3</sub> (26.9 mg, 0.0294 mmol), dppf (32.6 mg, 0.0588 mmol), CuI (11.2 mg, 0.0588 mmol), THF (40 mL) and Et<sub>3</sub>N (40 mL) was placed in a round-bottom flask equipped with a magnetic stirring bar. After degassing the reaction mixture several times, the reaction was carried out at 70 °C for 24 h with stirring. After the reaction mixture was cooled to room temperature, precipitates were removed by filtration, and the solvent was removed with a rotary evaporator. The crude was dissolved again in THF, then precipitated into cold MeOH. The residue was purified by automated flash chromatography on SiO<sub>2</sub> (CHCl<sub>3</sub>/hexane = 1/4 v/v, then CHCl<sub>3</sub> as an eluent) to afford **3** (127 mg, 0.0481 mmol, 20%) as a yellow solid.

$R_f = 1.00$  (CHCl<sub>3</sub>). <sup>1</sup>H NMR (CDCl<sub>3</sub>, 400 MHz)  $\delta$  7.78 (d,  $J = 7.6$  Hz, 16H), 7.58 (d,  $J = 8.0$  Hz, 16H), 7.55–7.48 (m, 48H), 7.35–7.31 (m, 24H) ppm; <sup>13</sup>C NMR (CDCl<sub>3</sub>, 100 MHz)  $\delta$  134.2, 134.1, 131.7, 131.6, 131.6, 131.1, 129.7, 128.4, 126.0, 123.5, 123.1, 122.8, 91.5, 90.9, 90.9, 89.1 ppm; <sup>29</sup>Si NMR (CDCl<sub>3</sub>, 80 MHz)  $\delta$  -78.2 ppm. HRMS (APCI) calcd. for C<sub>176</sub>H<sub>105</sub>O<sub>12</sub>Si<sub>8</sub> [M+H]<sup>+</sup>: 2633.5755, found 2633.5822. Elemental analysis calcd. for C<sub>176</sub>H<sub>104</sub>O<sub>12</sub>Si<sub>8</sub>: C 80.21 H 3.98 found: C 79.40 H 3.98.

### Synthesis of trimethyl(4-((4-(phenylethynyl)phenyl)ethynyl)phenyl)silane

#### - 4, Ph3TMS -

A mixture of **2** (122 mg, 0.600 mmol), 1-bromo-4-(trimethylsilyl)benzene (138 mg, 0.111 mL, 0.600 mmol), Pd<sub>2</sub>(dba)<sub>3</sub> (11.0 mg, 0.0120 mmol), dppf (13.3 mg, 0.0240 mmol), CuI (4.57 mg, 0.0240 mmol), THF (15 mL) and Et<sub>3</sub>N (15 mL) was placed in a round-bottom flask equipped with a magnetic stirring bar. After degassing the reaction mixture several times, the reaction was carried out at 70 °C for 20 h with stirring. After the reaction mixture was cooled to room temperature, precipitates were removed by filtration, and the solvent was removed with a rotary evaporator. The residue was purified by column chromatography on SiO<sub>2</sub> (hexane as an eluent). Further purification was carried out by recrystallization with CHCl<sub>3</sub> and MeOH (good and poor solvent, respectively) to afford **4** (49.7 mg, 0.142 mmol, 24%) as a white solid.

$R_f = 0.17$  (CHCl<sub>3</sub>/hexane = 1/1 v/v). <sup>1</sup>H NMR (CDCl<sub>3</sub>, 400 MHz)  $\delta$  7.56–7.47 (m, 10H), 7.38–7.32 (m, 3H), 0.28 (s, 9H) ppm; <sup>13</sup>C NMR (CDCl<sub>3</sub>, 100 MHz)  $\delta$  141.4, 133.3, 131.7, 131.6, 131.5, 130.7, 128.4, 128.4, 123.3, 123.2, 123.2, 101.2, 91.5, 91.3, 89.5, 89.2, –1.3 ppm. HRMS (EI) calcd. for C<sub>25</sub>H<sub>22</sub>Si [M]<sup>+</sup>: 350.1491, found 350.1487. Elemental analysis calcd. for C<sub>25</sub>H<sub>22</sub>Si: C 85.66 H 6.33 found: C 85.55 H 6.36.

### Synthesis of octa(4-((4-((4-(*tert*-butyl)phenyl)ethynyl)phenyl)ethynyl)phenyl)POSS

#### - 6, *t*-BuPOSS -

A mixture of 1-(*tert*-butyl)-4-((4-ethynylphenyl)ethynyl)benzene, **5** (673 mg, 2.60 mmol), **2** (530 mg, 0.260 mmol), Pd<sub>2</sub>(dba)<sub>3</sub> (28.6 mg, 0.0312 mmol), dppf (34.6 mg, 0.0624 mmol), CuI (11.9 mg, 0.0624 mmol), THF (40 mL) and Et<sub>3</sub>N (40 mL) was placed in a round-bottom flask equipped with a magnetic stirring bar. After degassing the reaction mixture several times, the reaction was carried out at 70 °C for 15 h with stirring. After the reaction mixture was cooled to room temperature, precipitates were removed by filtration, and the solvent was removed with a rotary evaporator. The crude was dissolved again in THF, then precipitated into cold MeOH. The residue was purified by automated flash chromatography on SiO<sub>2</sub> (CHCl<sub>3</sub>/hexane = 1/3 v/v as an eluent). Further purification was carried out by recrystallization with CHCl<sub>3</sub> and MeOH (good and poor solvent, respectively) to afford **6** (150 mg, 0.0486 mmol, 19%) as an orange solid.

$R_f = 0.33$  (CHCl<sub>3</sub>/hexane = 1/3 v/v). <sup>1</sup>H NMR (CDCl<sub>3</sub>, 400 MHz)  $\delta$  7.78 (d,  $J = 7.0$  Hz, 16H), 7.58 (d,  $J = 6.8$  Hz, 16H), 7.52–7.49 (m, 32H), 7.47 (d,  $J = 6.4$  Hz, 16H), 7.37 (d,  $J = 8.4$  Hz, 16H), 1.32 (s, 72H)

ppm;  $^{13}\text{C}$  NMR ( $\text{CDCl}_3$ , 100 MHz)  $\delta$  151.8, 134.1, 131.6, 131.5, 131.4, 131.1, 129.7, 126.0, 125.4, 123.8, 122.6, 120.0, 91.7, 90.9, 90.8, 88.5, 34.8, 31.2 ppm;  $^{29}\text{Si}$  NMR ( $\text{CDCl}_3$ , 80 MHz)  $\delta$  -78.1 ppm. HRMS (MALDI) calcd. for  $\text{C}_{208}\text{H}_{168}\text{O}_{12}\text{Si}_8$   $[\text{M}]^+$ : 3081.0690, found: 3081.0724. Elemental analysis calcd. for  $\text{C}_{208}\text{H}_{168}\text{O}_{12}\text{Si}_8$ : C 81.00 H 5.49 found: C 79.99 H 5.36.

### Synthesis of 4-((4-((4-(*tert*-butyl)phenyl)ethynyl)phenyl)ethynyl)phenyl)trimethylsilane

#### - 7, *t*-BuTMS -

A mixture of **5** (152 mg, 0.586 mmol), 1-bromo-4-(trimethylsilyl)benzene (148 mg, 0.121 mL, 0.645 mmol),  $\text{Pd}_2(\text{dba})_3$  (16.1 mg, 0.0176 mmol), dppf (19.5 mg, 0.0352 mmol), CuI (6.70 mg, 0.0352 mmol), THF (15 mL) and  $\text{Et}_3\text{N}$  (15 mL) was placed in a round-bottom flask equipped with a magnetic stirring bar. After degassing the reaction mixture several times, the reaction was carried out at 70 °C for 19 h with stirring. After the reaction mixture was cooled to room temperature, precipitates were removed by filtration, and the solvent was removed with a rotary evaporator. The residue was purified by column chromatography on  $\text{SiO}_2$  ( $\text{CHCl}_3/\text{hexane}$  = 1/2 v/v as an eluent) to afford **7** (105 mg, 0.258 mmol, 44%) as a yellow solid.

$R_f$  = 0.53 ( $\text{CHCl}_3/\text{hexane}$  = 1/2 v/v).  $^1\text{H}$  NMR ( $\text{CDCl}_3$ , 400 MHz)  $\delta$  7.51–7.44 (m, 10H), 7.40–7.34 (m, 2H), 1.33 (s, 9H), 0.28 (s, 9H) ppm;  $^{13}\text{C}$  NMR ( $\text{CDCl}_3$ , 100 MHz)  $\delta$  151.8, 141.3, 133.2, 131.5, 131.5, 131.4, 130.7, 125.4, 123.4, 123.4, 123.0, 120.0, 91.5, 91.3, 89.6, 88.5, 34.8, 31.2, -1.2 ppm. HRMS (EI) calcd. for  $\text{C}_{29}\text{H}_{30}\text{Si}$   $[\text{M}]^+$ : 406.2117, found 406.2113.

### Synthesis of 2,6-diisopropyl-4-(phenylethynyl)aniline - 9 -

A mixture of 4-iodo-2,6-diisopropylaniline, **8** (11.0 g, 36.3 mmol), ethynylbenzene (4.08 g, 4.39 mL, 39.9 mmol),  $\text{PdCl}_2(\text{PPh}_3)_2$  (765 mg, 1.09 mmol),  $\text{PPh}_3$  (571 mg, 2.18 mmol), CuI (208 mg, 1.09 mmol), THF (50 mL) and  $\text{Et}_3\text{N}$  (50 mL) was placed in a round-bottom flask equipped with a magnetic stirring bar. After degassing the reaction mixture several times, the reaction was carried out at 50 °C for 12 h with stirring. After the reaction mixture was cooled to room temperature, precipitates were removed by filtration, and the solvent was removed with a rotary evaporator. The residue was purified by column chromatography on  $\text{SiO}_2$  ( $\text{CHCl}_3/\text{hexane}$  = 1/1 v/v as an eluent) to afford **9** (8.85 g, 31.9 mmol, 87%) as a dark red solid.

$R_f$  = 0.24 ( $\text{CHCl}_3/\text{hexane}$  = 1/1 v/v).  $^1\text{H}$  NMR ( $\text{CDCl}_3$ , 400 MHz)  $\delta$  7.53–7.51 (m, 2H), 7.34–7.28 (m, 3H), 7.23 (s, 2H), 3.91 (s, 2H), 2.89 (sep,  $J$  = 6.8 Hz, 2H), 1.29 (d,  $J$  = 6.8 Hz, 12H) ppm;  $^{13}\text{C}$  NMR ( $\text{CDCl}_3$ ,

100 MHz)  $\delta$  140.9, 132.2, 131.4, 128.2, 127.5, 126.6, 124.1, 112.3, 91.2, 86.8, 27.9, 22.3 ppm. HRMS (APCI) calcd. for  $C_{20}H_{24}N$   $[M+H]^+$ : 278.1903, found 278.1898.

#### Synthesis of 2-iodo-1,3-diisopropyl-5-(phenylethynyl)benzene - **10** -

A mixture of **9** (6.75 g, 24.3 mmol),  $CH_3CN$  (300 mL),  $H_2O$  (200 mL) and concentrated  $H_2SO_4$  (30 mL) was placed in an Erlenmeyer flask at 0 °C, equipped with a magnetic stirring bar. To the reaction mixture,  $NaNO_2$  (2.18 g, 31.6 mmol) in  $H_2O$  (4 mL) was slowly added at 0 °C. After stirring for 20 min, the mixture was added into a solution of KI (25.1 g, 151 mmol) in  $CH_3CN$  (100 mL) and  $H_2O$  (100 mL) at 0 °C. The reaction mixture was stirred at room temperature for 36 h, then at 60 °C for 1 h. The mixture was quenched by the addition of aqueous  $NaHSO_3$  solution, and the organic layer was extracted three times with  $CHCl_3$ . The combined organic layer was washed with brine and dried over  $MgSO_4$ .  $MgSO_4$  was removed by filtration, and the solvent was evaporated. The residue was purified by column chromatography on  $SiO_2$  ( $CHCl_3$ /hexane = 1/1 v/v as an eluent) to afford **10** (8.12 g, 0.0209 mmol, 66%) as an orange liquid.

$R_f$  = 0.78 ( $CHCl_3$ /hexane = 1/1 v/v).  $^1H$  NMR ( $CDCl_3$ , 400 MHz)  $\delta$  7.56–7.54 (m, 2H), 7.37–7.34 (m, 3H), 7.23 (s, 2H), 3.40 (sep,  $J$  = 6.8 Hz, 2H), 1.25 (d,  $J$  = 6.8 Hz, 12H) ppm;  $^{13}C$  NMR ( $CDCl_3$ , 100 MHz)  $\delta$  151.3, 131.6, 128.3, 128.3, 126.8, 123.3, 123.1, 109.3, 89.7, 89.1, 39.3, 23.2 ppm. HRMS (APCI) calcd. for  $C_{20}H_{22}I$   $[M+H]^+$ : 389.0761, found 389.0751.

#### Synthesis of ((2,6-diisopropyl-4-(phenylethynyl)phenyl)ethynyl)trimethylsilane - **11** -

A mixture of **10** (3.81 g, 9.81 mmol), trimethylsilylacetylene (1.45 g, 2.04 mL, 14.7 mmol),  $PdCl_2(PPh_3)_2$  (207 mg, 0.294 mmol),  $PPh_3$  (154 mg, 0.588 mmol),  $CuI$  (56.0 mg, 0.294 mmol), THF (20 mL) and  $Et_3N$  (20 mL) was placed in a round-bottom flask equipped with a magnetic stirring bar. After degassing the reaction mixture several times, the reaction was carried out at 70 °C for 2 days with stirring. After the reaction mixture was cooled to room temperature, precipitates were removed by filtration, and the solvent was removed with a rotary evaporator. The residue was purified by column chromatography on  $SiO_2$  (Hexane as an eluent) to afford **11** (2.11 g, 5.86 mmol, 60%) as a yellow solid.

$R_f$  = 0.40 (hexane).  $^1H$  NMR ( $CDCl_3$ , 400 MHz)  $\delta$  7.59–7.57 (m, 2H), 7.37–7.35 (m, 3H), 7.31 (s, 2H), 3.54 (sep,  $J$  = 6.8 Hz, 2H), 1.30 (d,  $J$  = 6.8 Hz, 12H), 0.30 (s, 9H) ppm;  $^{13}C$  NMR ( $CDCl_3$ , 100 MHz)  $\delta$

151.3, 131.6, 128.3, 128.3, 125.5, 123.3, 123.0, 121.3, 104.5, 101.9, 90.1, 90.1, 31.7, 22.9, -0.1 ppm. HRMS (APCI) calcd. for  $C_{25}H_{31}Si$   $[M+H]^+$ : 359.2190, found 359.2180. Elemental analysis calcd. for  $C_{25}H_{30}Si$ : C 83.74 H 8.43 found: C 83.54 H 8.48.

#### Synthesis of 2-ethynyl-1,3-diisopropyl-5-(phenylethynyl)benzene - **12** -

**11** (200 mg, 0.588 mmol) in THF (15 mL) was placed in a round-bottom flask equipped with a magnetic stirring bar. After degassing several times,  $NBu_4F$  (1 M in THF, 0.667 mL, 0.667 mmol) was added to the solution at room temperature for 15 min with stirring. The mixture was quenched by the addition of  $H_2O$ , and the organic layer was extracted three times with  $CHCl_3$ . The combined organic layer was washed with brine and dried over  $MgSO_4$ .  $MgSO_4$  was removed by filtration, and the solvent was removed with a rotary evaporator. The residue was purified by column chromatography on  $SiO_2$  (hexane as an eluent) to afford **12** (146 mg, 0.510 mmol, 90%) as a transparent liquid.

$R_f$  = 0.55 (hexane).  $^1H$  NMR ( $CDCl_3$ , 400 MHz)  $\delta$  7.56–7.54 (m, 2H), 7.32–7.30 (m, 5H), 3.55 (sep,  $J$  = 6.8 Hz, 2H), 3.51 (s, 1H), 1.26 (d,  $J$  = 6.8 Hz, 12H) ppm;  $^{13}C$  NMR ( $CDCl_3$ , 100 MHz)  $\delta$  151.6, 131.6, 128.3, 128.3, 125.5, 123.4, 123.2, 120.0, 90.3, 89.9, 86.5, 80.2, 31.5, 23.1 ppm. HRMS (APCI) calcd. for  $C_{22}H_{23}$   $[M+H]^+$ : 287.1794, found 287.1790. Elemental analytical data were not obtained because **12** is unstable.

#### Synthesis of octa(4-((2,6-diisopropyl-4-(phenylethynyl)phenyl)ethynyl)phenyl)POSS

##### - **13**, *i*-PrPOSS -

A mixture of **12** (626 mg, 2.18 mmol), **2** (445 mg, 0.218 mmol),  $Pd_2(dba)_3$  (24.0 mg, 0.0262 mmol), dppf (29.1 mg, 0.0524 mmol),  $CuI$  (10.0 mg, 0.0524 mmol), THF (40 mL) and  $Et_3N$  (40 mL) was placed in a round-bottom flask equipped with a magnetic stirring bar. After degassing the reaction mixture several times, the reaction was carried out at 70 °C for 20 h with stirring. After the reaction mixture was cooled to room temperature, precipitates were removed by filtration, and the solvent was removed with a rotary evaporator. The crude was dissolved again in THF, then precipitated into cold MeOH. The residue was purified by automated flash chromatography on  $SiO_2$  ( $CHCl_3$ /hexane = 1/3 v/v as an eluent). Further purification was carried out by recrystallization with  $CHCl_3$  and MeOH (good and poor solvent, respectively) to afford **13** (162 mg, 0.0490 mmol, 22%) as a white solid.

$R_f = 0.33$  (CHCl<sub>3</sub>/hexane = 1/3 v/v). <sup>1</sup>H NMR (CDCl<sub>3</sub>, 400 MHz)  $\delta$  7.84–7.82 (m, 16H), 7.62–7.56 (m, 32H), 7.36–7.31 (m, 40H), 3.61 (sep,  $J = 6.8$  Hz, 16H), 1.34 (d,  $J = 6.8$  Hz, 96H) ppm; <sup>13</sup>C NMR (CDCl<sub>3</sub>, 100 MHz)  $\delta$  151.0, 134.1, 131.6, 130.8, 129.5, 128.3, 128.3, 126.5, 125.7, 123.3, 123.2, 120.8, 98.4, 90.3, 90.1, 88.2, 31.9, 23.1 ppm; <sup>29</sup>Si NMR (CDCl<sub>3</sub>, 80 MHz)  $\delta$  –78.2 ppm. HRMS (MALDI) calcd. for C<sub>224</sub>H<sub>200</sub>O<sub>12</sub>Si<sub>8</sub> [M]<sup>+</sup>: 3305.3194, found: 3305.3179. Elemental analysis calcd. for C<sub>224</sub>H<sub>200</sub>O<sub>12</sub>Si<sub>8</sub>: C 81.31 H 6.09 found: C 80.60 H 6.09.

### Synthesis of (4-((2,6-diisopropyl-4-(phenylethynyl)phenyl)ethynyl)phenyl)trimethylsilane

#### - **14**, *i*-PrTMS -

A mixture of **12** (146 mg, 0.510 mmol), 1-bromo-4-(trimethylsilyl)benzene (129 mg, 0.105 mL, 0.561 mmol), Pd<sub>2</sub>(dba)<sub>3</sub> (14.0 mg, 0.0153 mmol), dppf (17.0 mg, 0.0306 mmol), CuI (5.8 mg, 0.0306 mmol), THF (15 mL) and Et<sub>3</sub>N (15 mL) was placed in a round-bottom flask equipped with a magnetic stirring bar. After degassing the reaction mixture several times, the reaction was carried out at 70 °C for 12 h with stirring. After the reaction mixture was cooled to room temperature, precipitates were removed by filtration, and the solvent was removed with a rotary evaporator. The residue was purified by column chromatography on SiO<sub>2</sub> (CHCl<sub>3</sub>/hexane = 1/2 v/v as an eluent) to afford **14** (34.0 mg, 0.0782 mmol, 15%) as a white solid.

$R_f = 0.57$  (CHCl<sub>3</sub>/hexane = 1/2 v/v). <sup>1</sup>H NMR (CDCl<sub>3</sub>, 400 MHz)  $\delta$  7.67–7.62 (m, 6H), 7.45–7.41 (m, 6H), 3.71 (sep,  $J = 6.8$  Hz, 2H), 1.43 (d,  $J = 6.8$  Hz, 12H), 0.38 (s, 9H) ppm; <sup>13</sup>C NMR (CDCl<sub>3</sub>, 100 MHz)  $\delta$  150.8, 141.1, 133.3, 131.6, 130.4, 128.3, 128.2, 125.6, 124.0, 123.3, 123.0, 121.2, 99.1, 90.2, 90.2, 86.9, 31.8, 23.1, 0.4 ppm. HRMS (APCI) calcd. for C<sub>31</sub>H<sub>35</sub>Si [M+H]<sup>+</sup>: 435.2503, found 435.2497. Elemental analysis calcd. for C<sub>31</sub>H<sub>34</sub>Si: C 85.66 H 7.88 found: C 85.48 H 7.90.



# NMR spectra

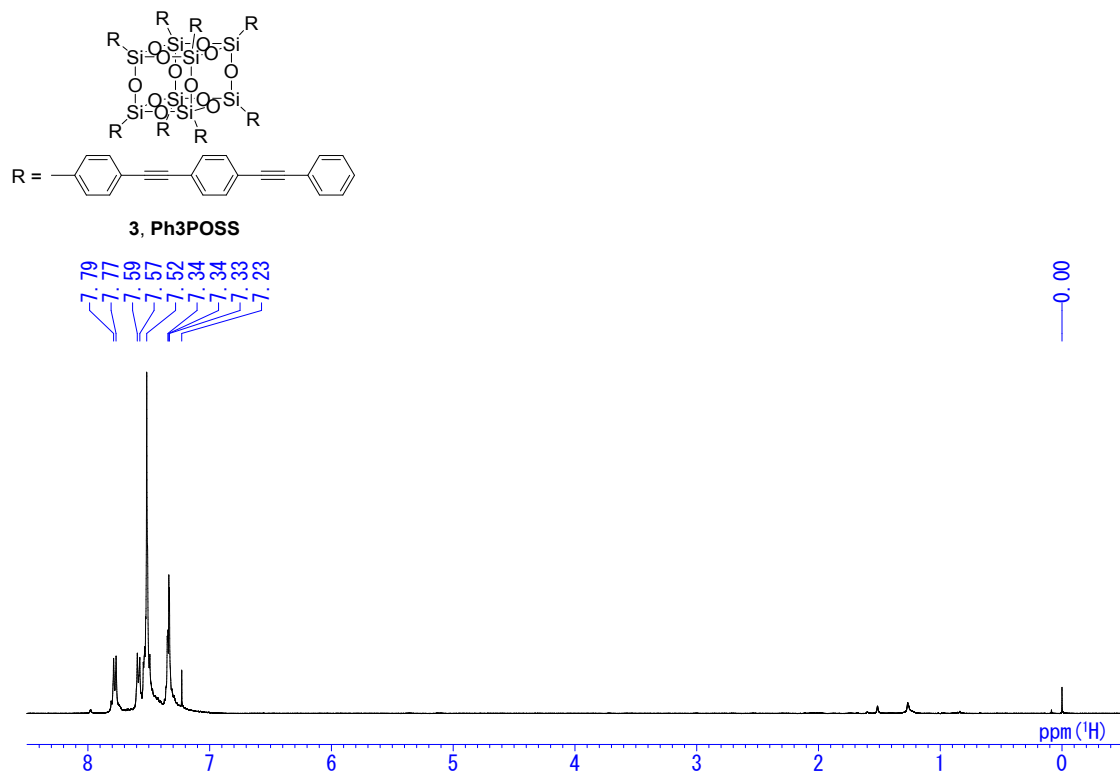

**Figure S1.**  $^1\text{H}$  NMR spectrum of **3** in  $\text{CDCl}_3$ .

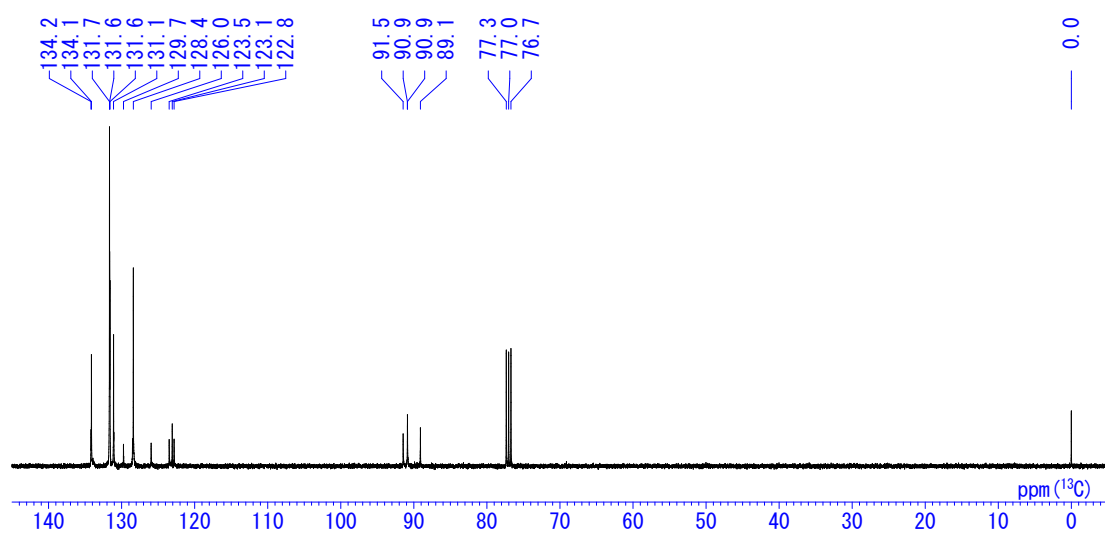

**Figure S2.**  $^{13}\text{C}$  NMR spectrum of **3** in  $\text{CDCl}_3$ .

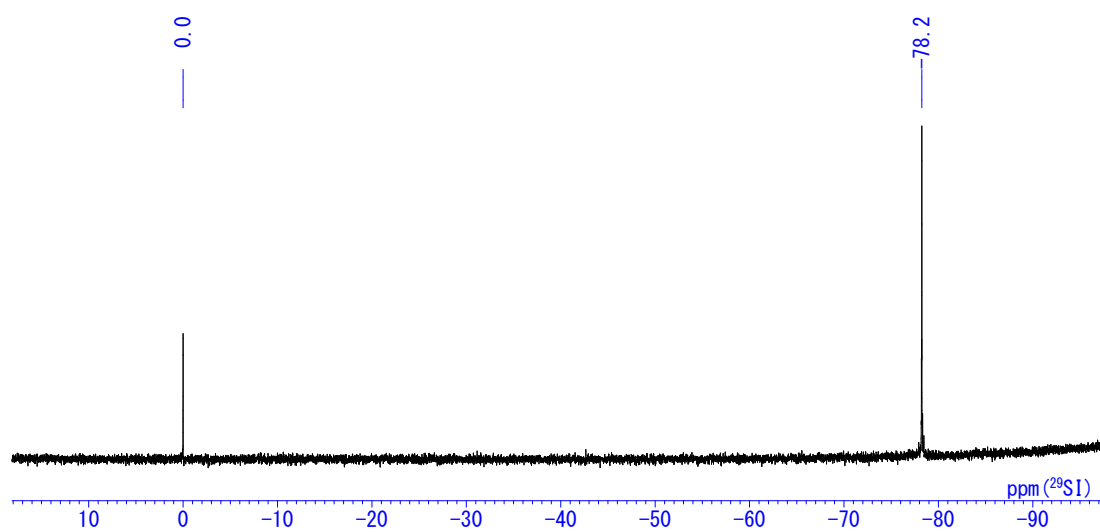

**Figure S3.**  $^{29}\text{Si}$  NMR spectrum of **3** in  $\text{CDCl}_3$ .

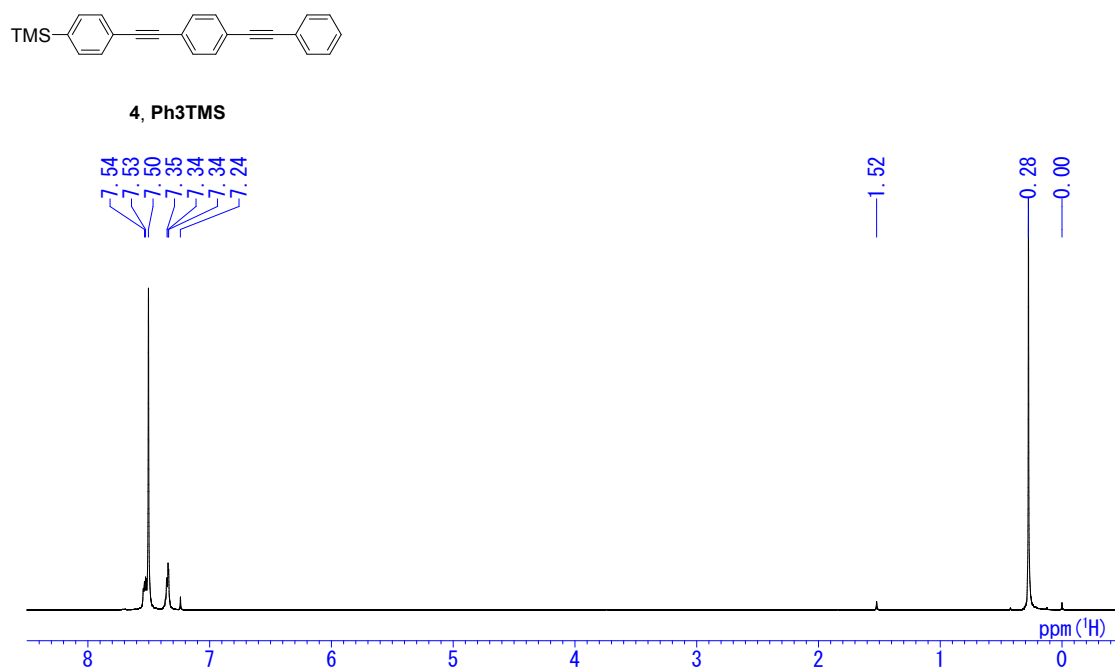

**Figure S4.**  $^1\text{H}$  NMR spectrum of **4** in  $\text{CDCl}_3$ .

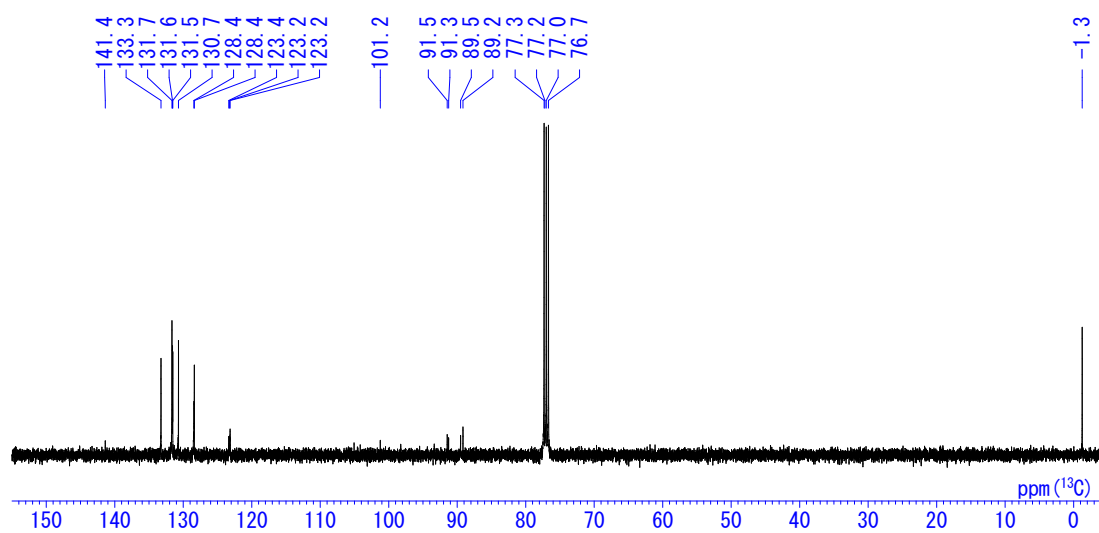

**Figure S5.**  $^{13}\text{C}$  NMR spectrum of **4** in  $\text{CDCl}_3$ .

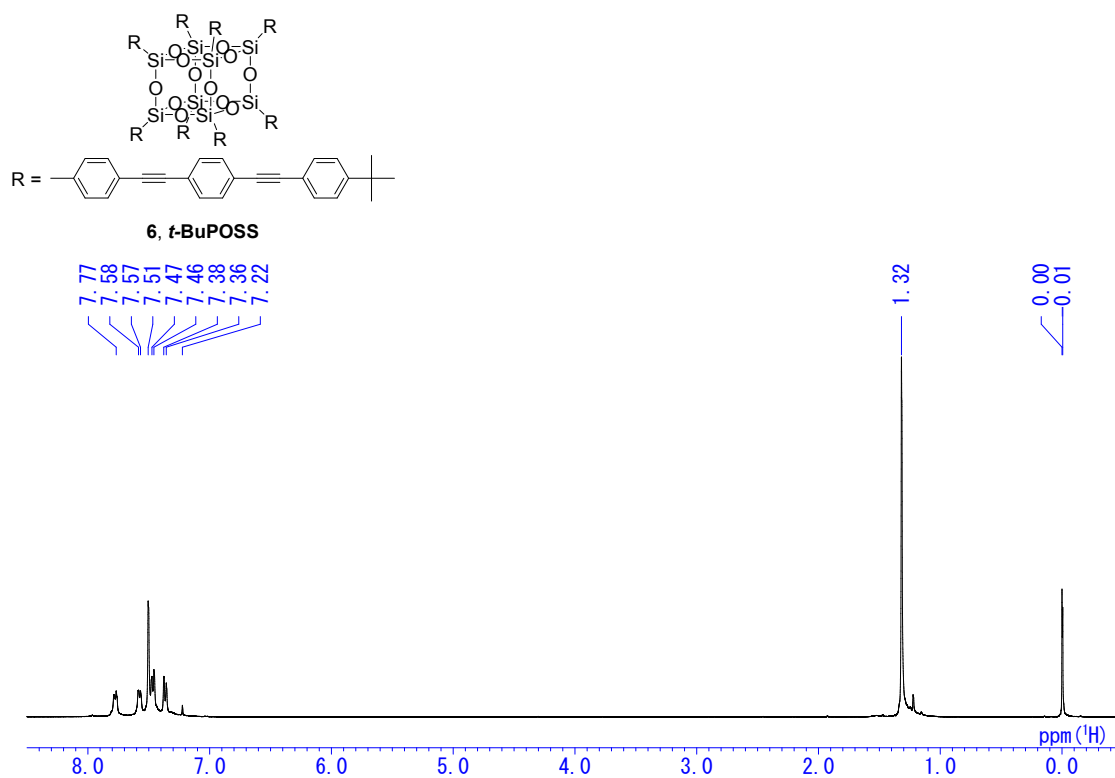

**Figure S6.**  $^1\text{H}$  NMR spectrum of **6** in  $\text{CDCl}_3$ .

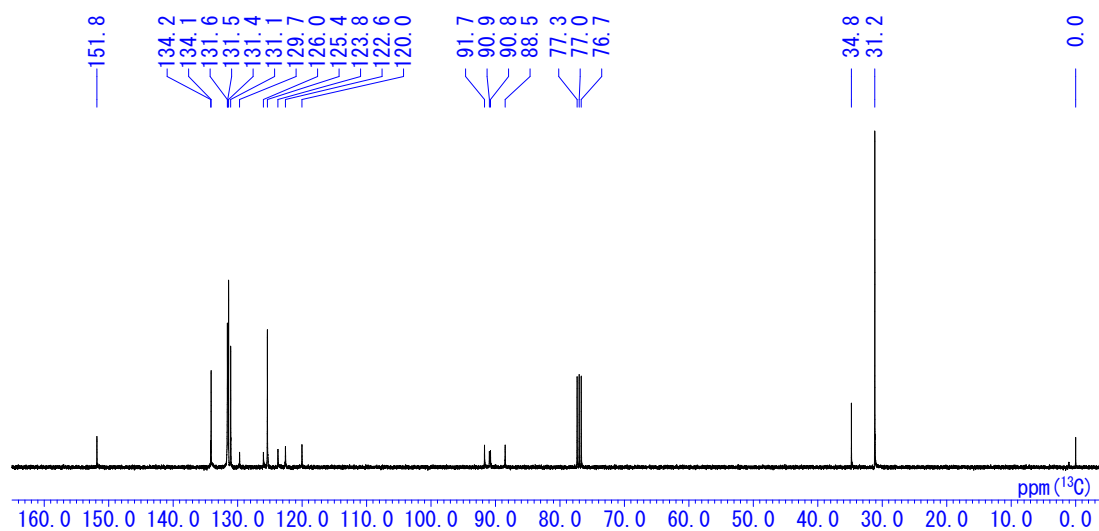

**Figure S7.**  $^{13}\text{C}$  NMR spectrum of **6** in  $\text{CDCl}_3$ .

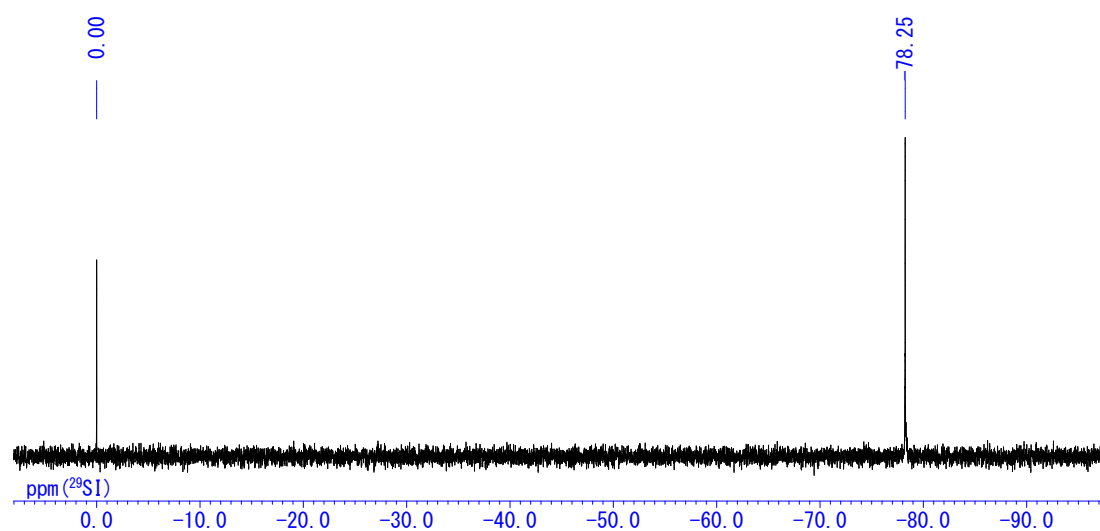

**Figure S8.**  $^{29}\text{Si}$  NMR spectrum of **6** in  $\text{CDCl}_3$ .

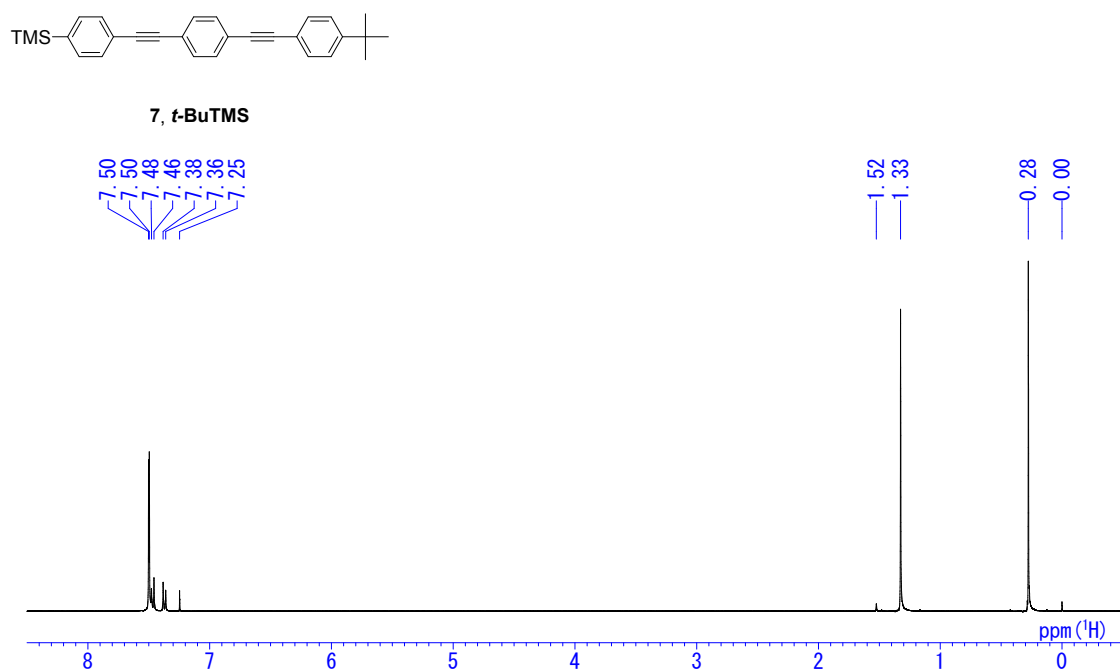

**Figure S9.**  $^1\text{H}$  NMR spectrum of **7** in  $\text{CDCl}_3$ .

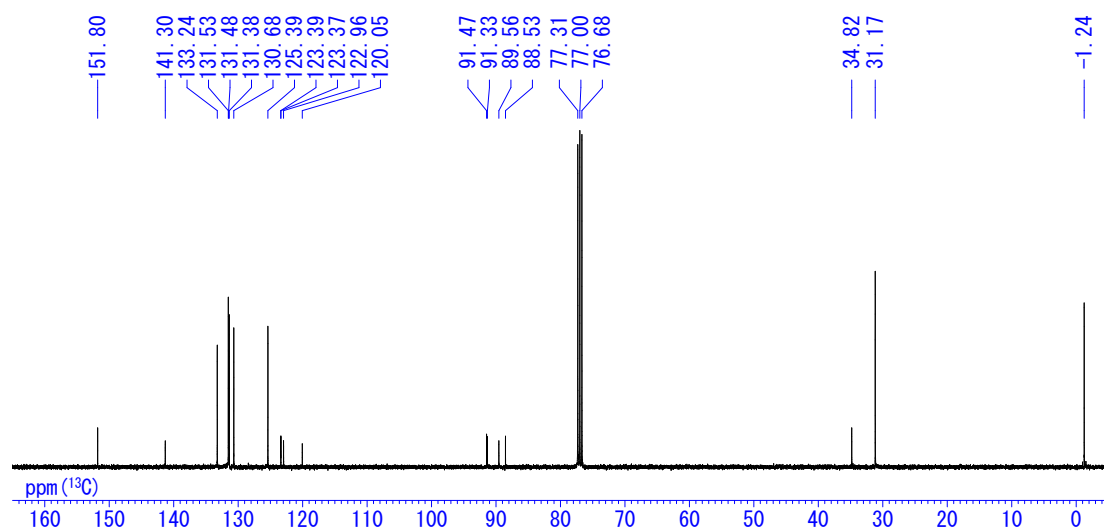

**Figure S10.**  $^{13}\text{C}$  NMR spectrum of **7** in  $\text{CDCl}_3$ .

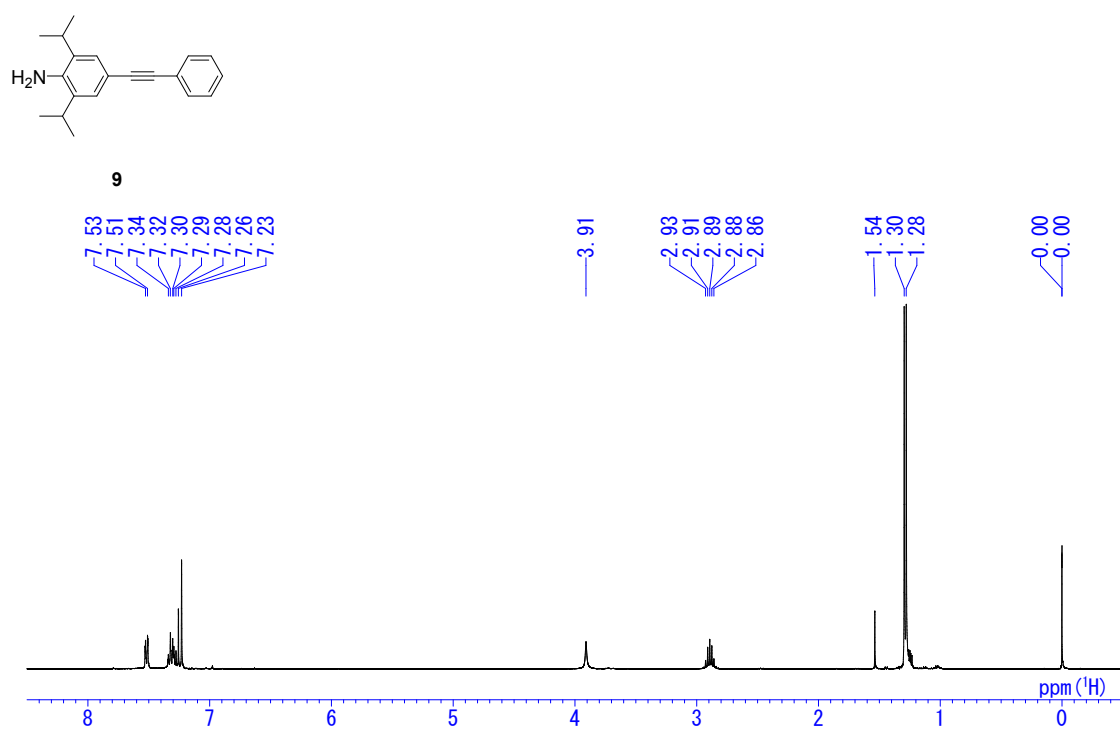

**Figure S11.** <sup>1</sup>H NMR spectrum of **9** in CDCl<sub>3</sub>.

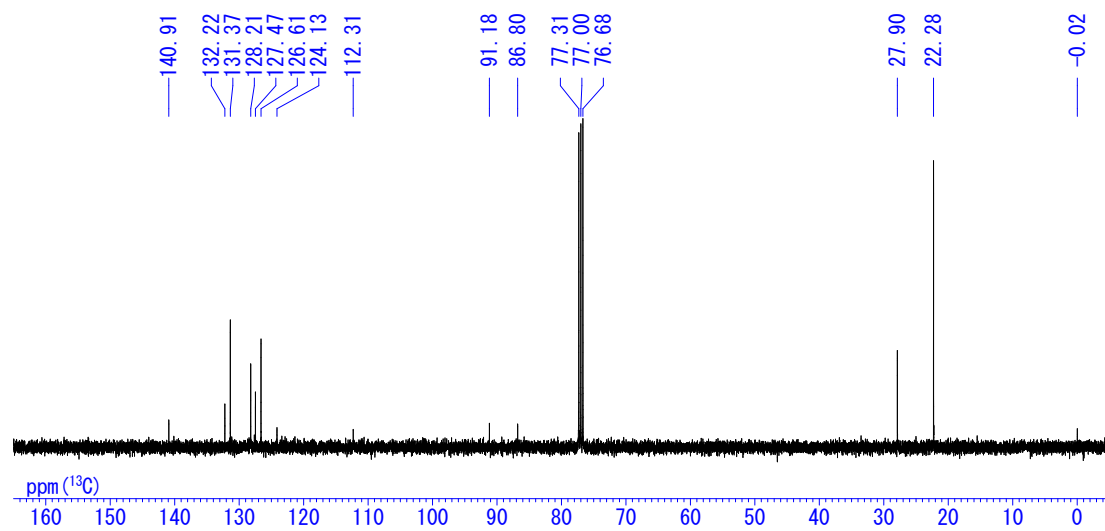

**Figure S12.** <sup>13</sup>C NMR spectrum of **9** in CDCl<sub>3</sub>.

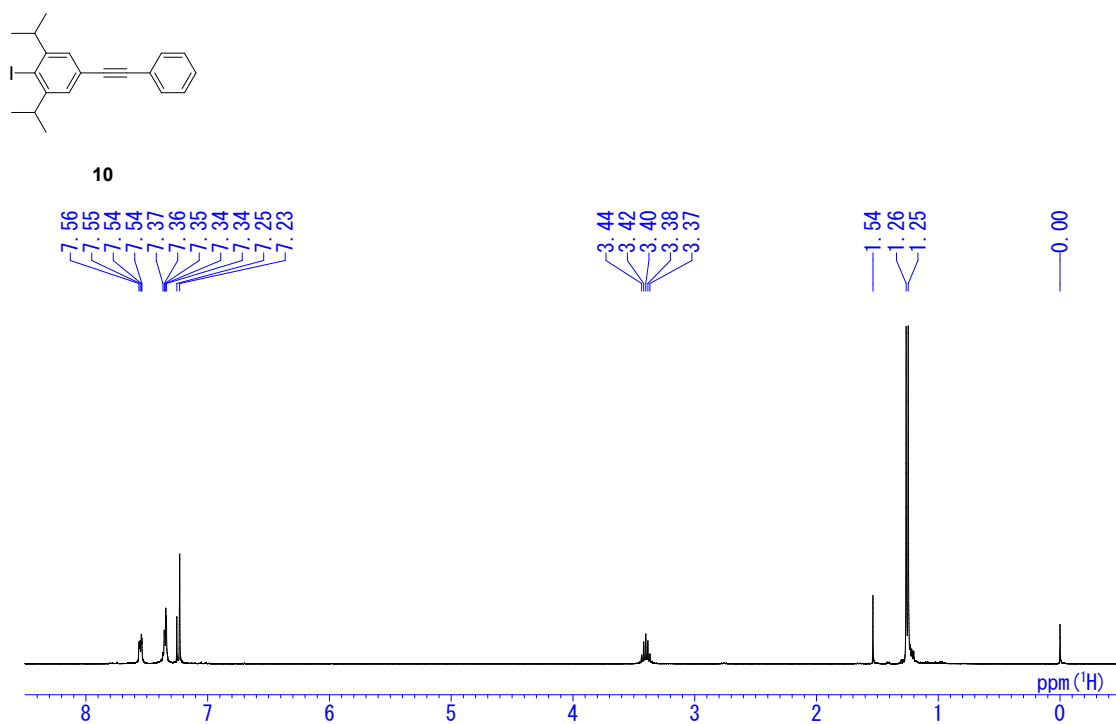

**Figure S13.** <sup>1</sup>H NMR spectrum of **10** in CDCl<sub>3</sub>.

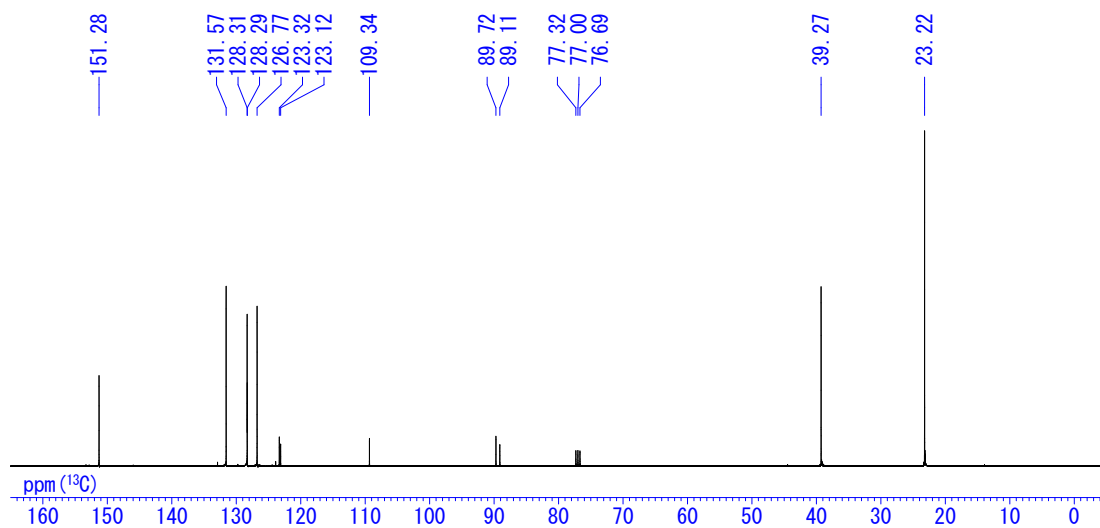

**Fig**

**ure S14.** <sup>13</sup>C NMR spectrum of **10** in CDCl<sub>3</sub>.



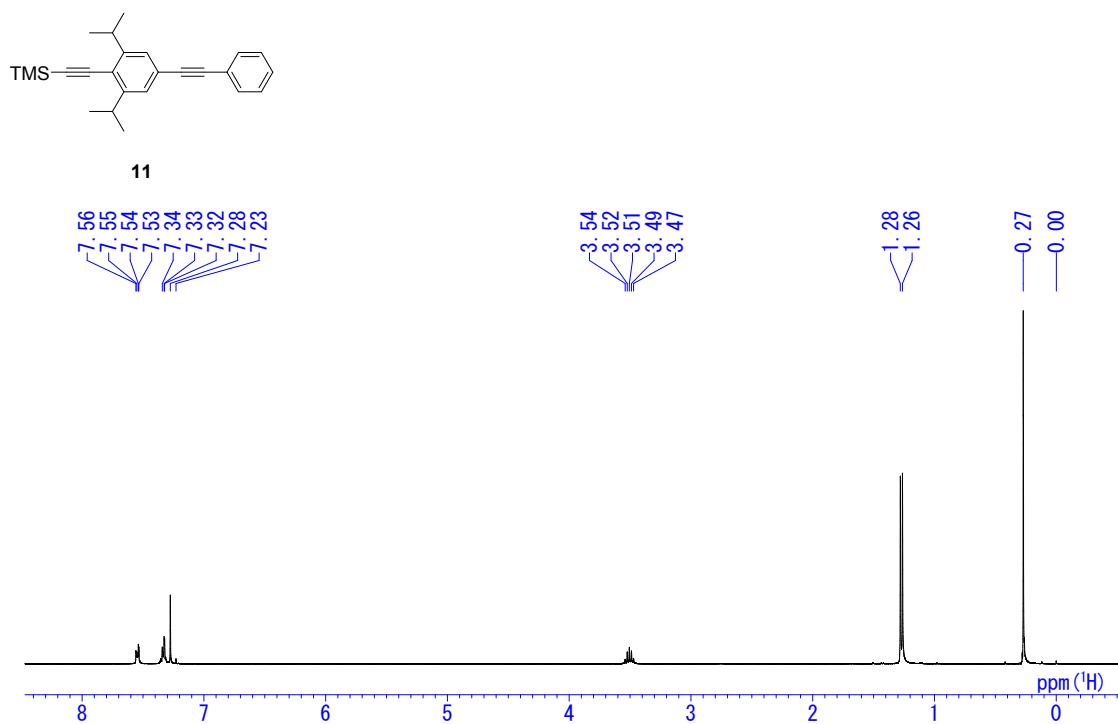

**Figure S15.**  $^1\text{H}$  NMR spectrum of **11** in  $\text{CDCl}_3$ .

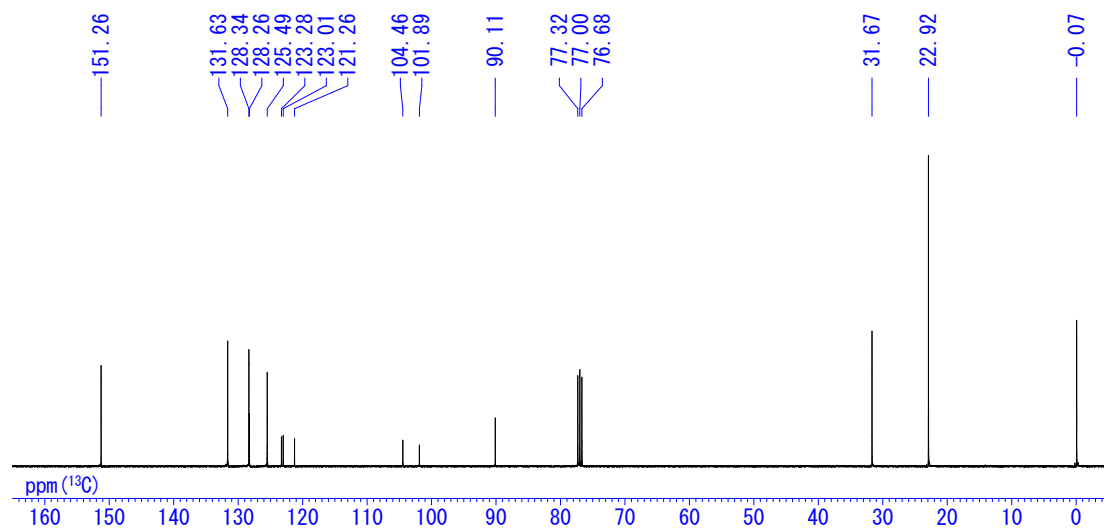

**Figure S16.**  $^{13}\text{C}$  NMR spectrum of **11** in  $\text{CDCl}_3$ .

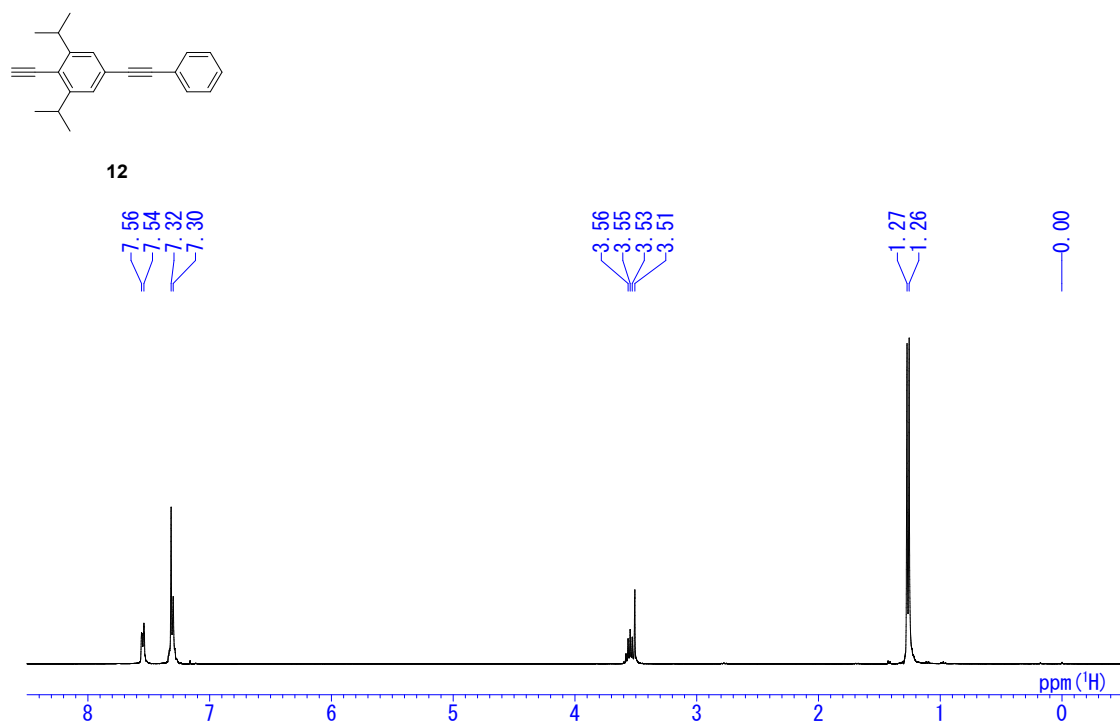

**Figure S17.** <sup>1</sup>H NMR spectrum of **12** in CDCl<sub>3</sub>.

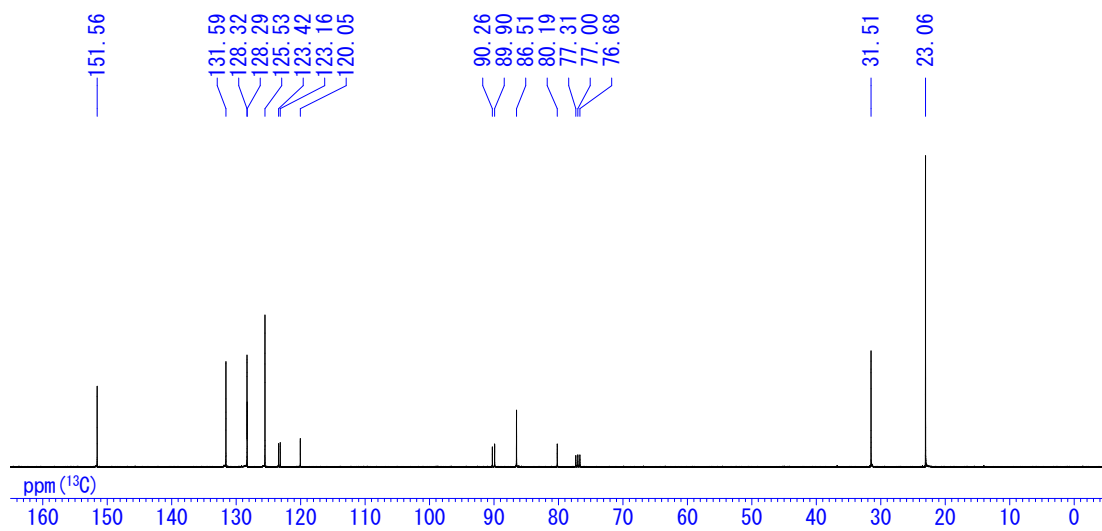

**Figure S18.** <sup>13</sup>C NMR spectrum of **12** in CDCl<sub>3</sub>.

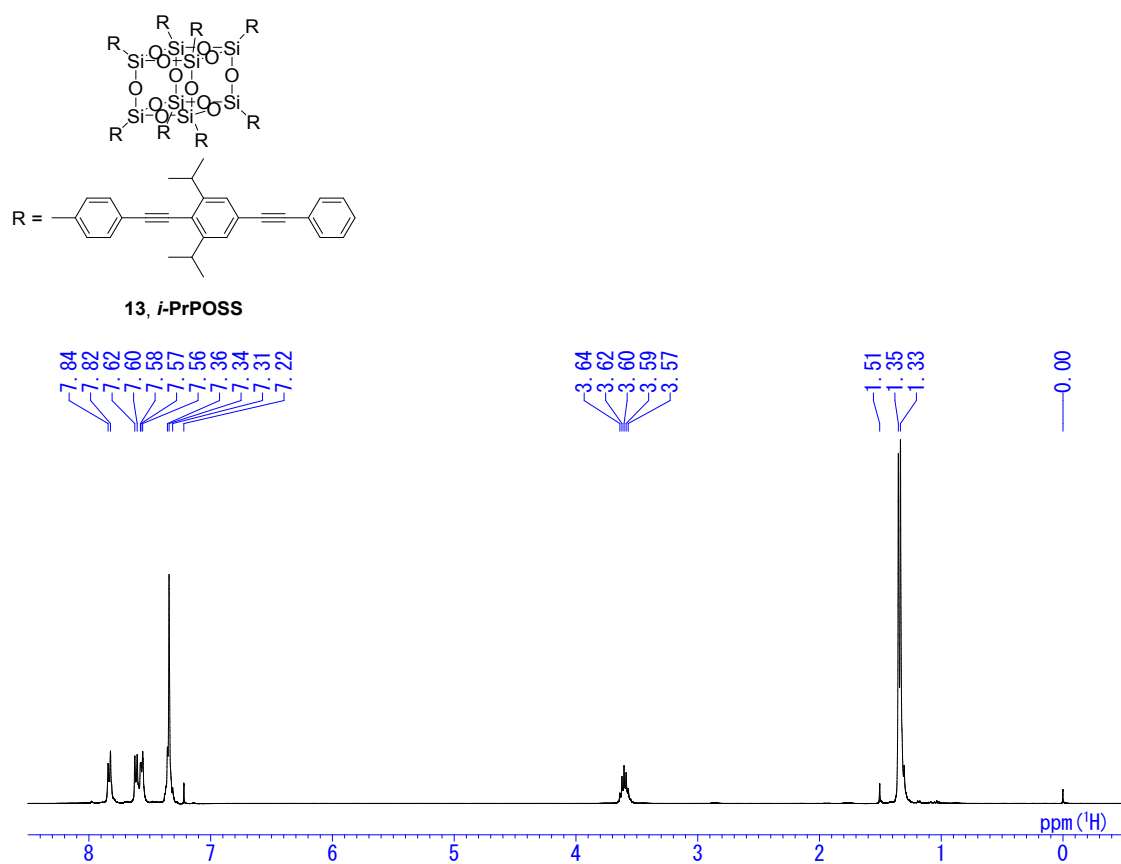

**Figure S19.**  $^1\text{H}$  NMR spectrum of **13** in  $\text{CDCl}_3$ .

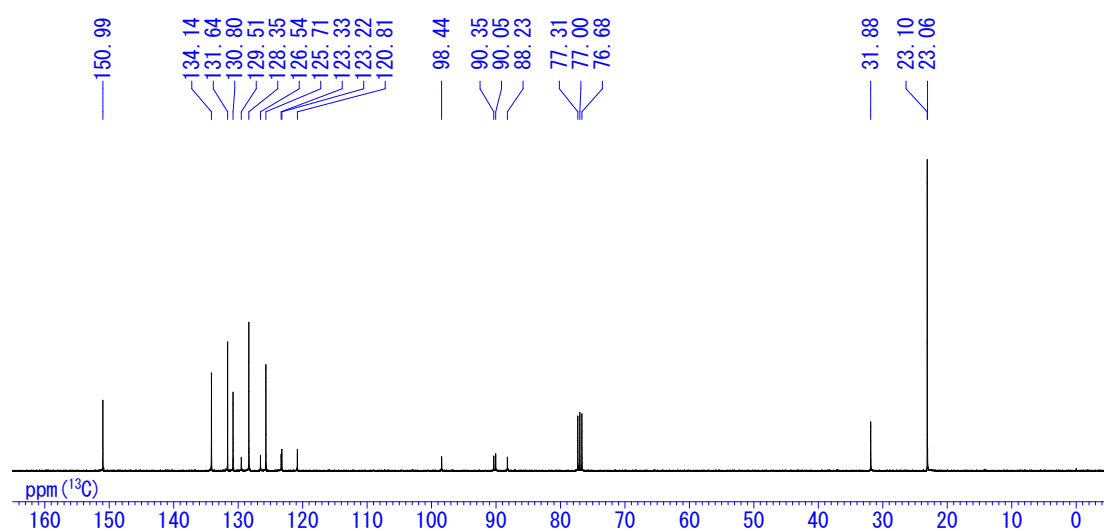

**Figure S20.**  $^{13}\text{C}$  NMR spectrum of **13** in  $\text{CDCl}_3$ .

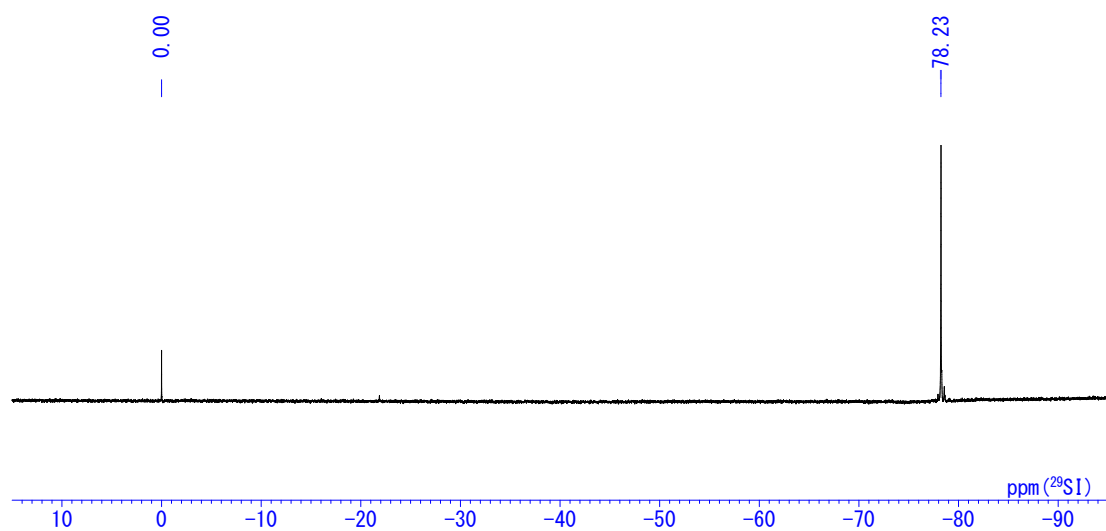

**Fig**

**ure S21.**  $^{29}\text{Si}$  NMR spectrum of **13** in  $\text{CDCl}_3$ .

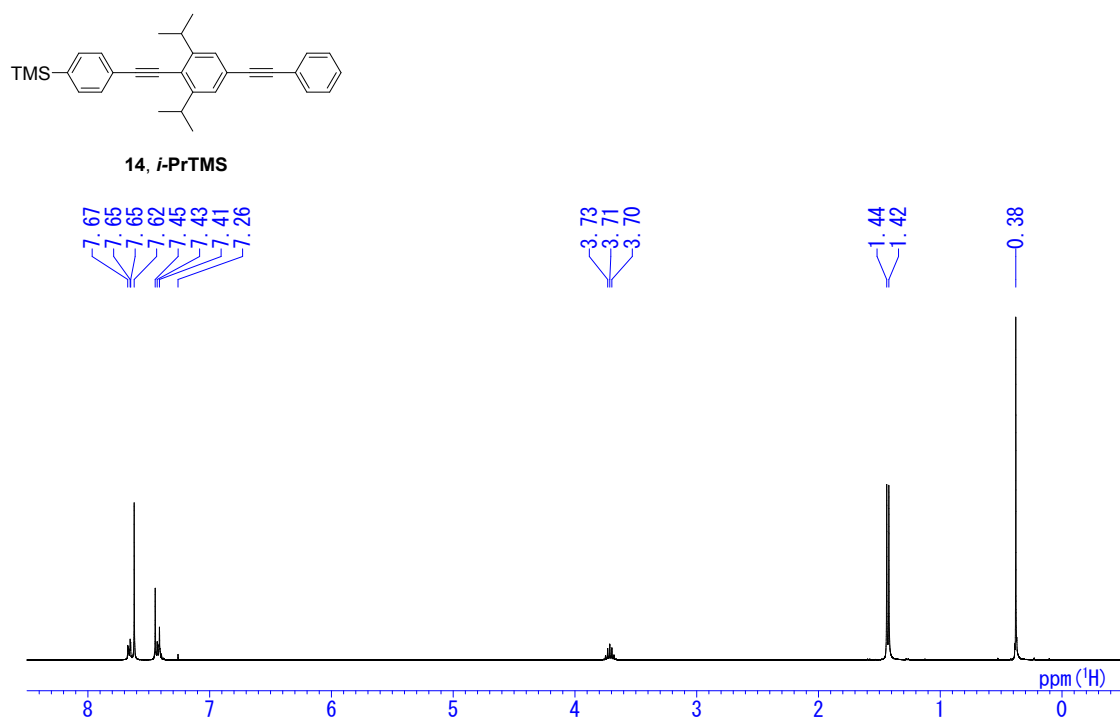

**Figure S22.** <sup>1</sup>H NMR spectrum of **14** in CDCl<sub>3</sub>.

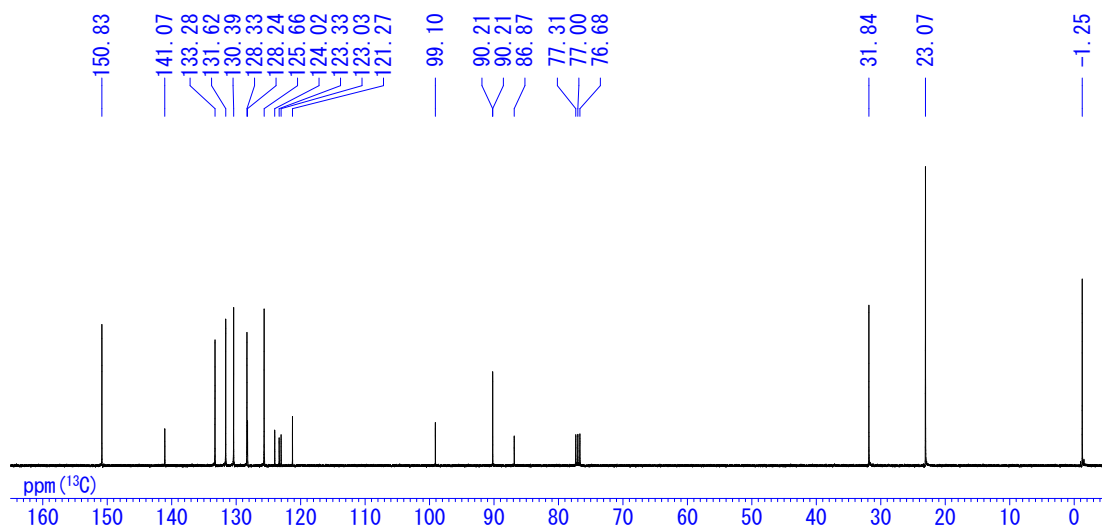

**Figure S23.** <sup>13</sup>C NMR spectrum of **15** in CDCl<sub>3</sub>.

# PL lifetime decay curves

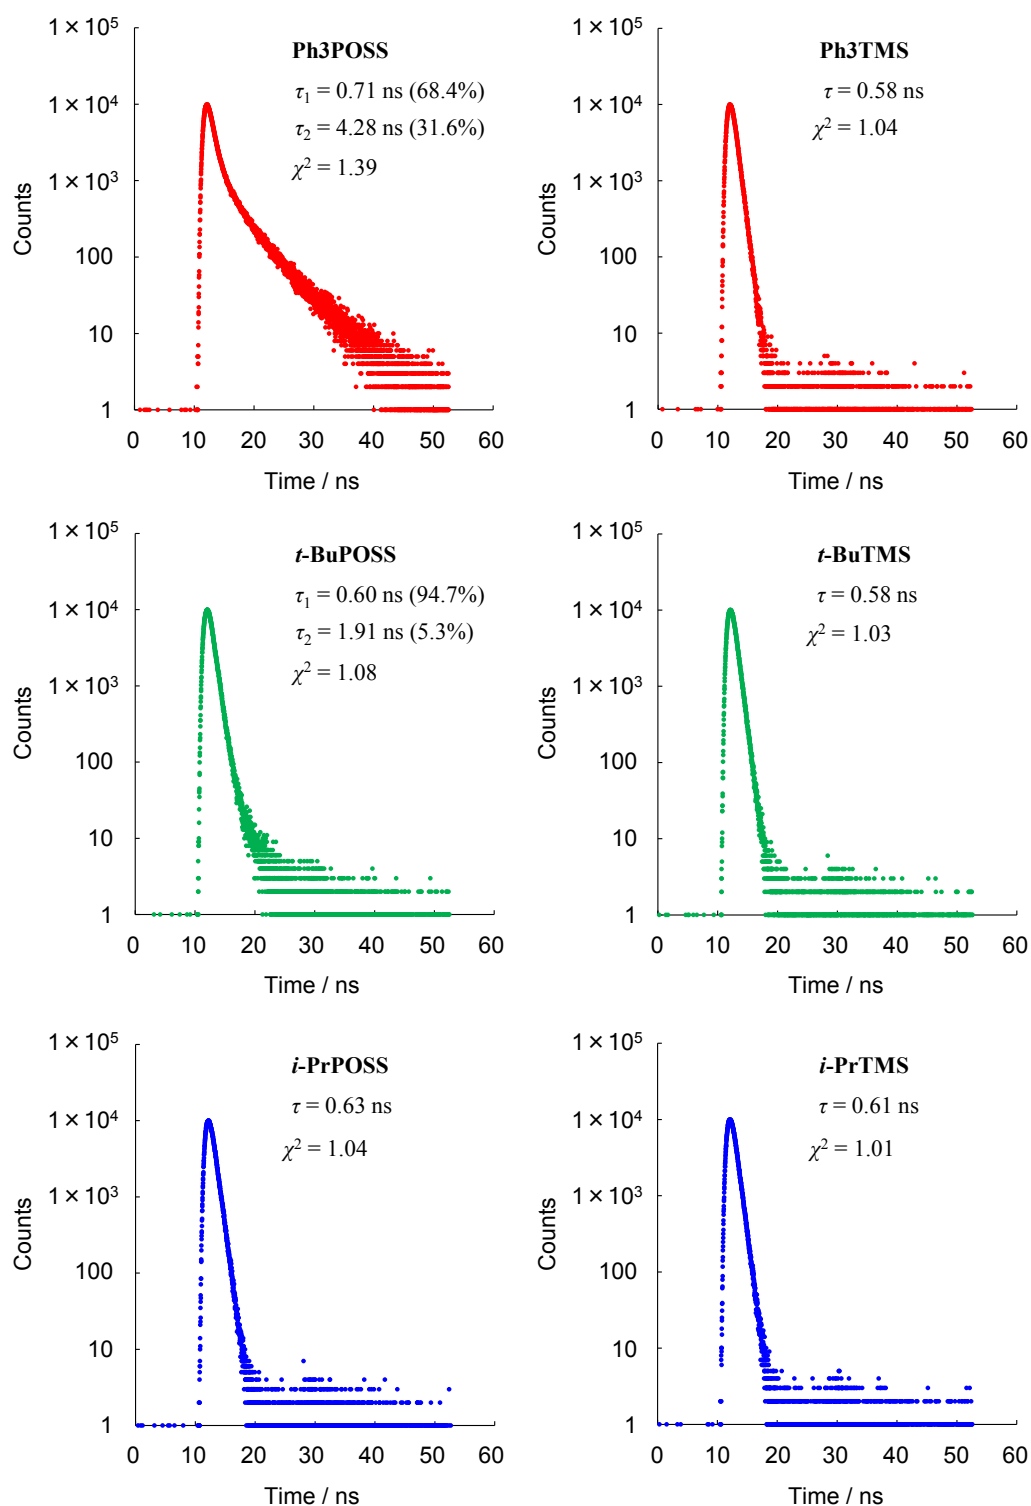

**Figure S24.** PL lifetime decay curves of **Ph3POSS**, **Ph3TMS**, ***t*-BuPOSS**, ***t*-BuTMS**, ***i*-PrPOSS** and ***i*-PrTMS** in  $\text{CHCl}_3$  ( $1.0 \times 10^{-6}$  M) at room temperature, excited at 292 nm with LED laser. The values at 416 nm were monitored.

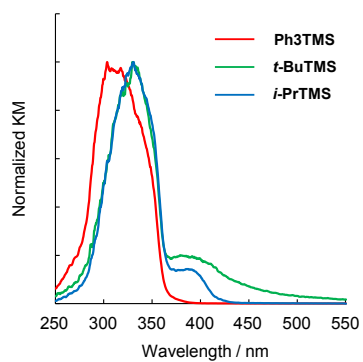

**Figure S25.** Diffuse reflection (Kubelka-Munk) spectra of **Ph3TMS**, ***t*-BuTMS** and ***i*-PrTMS** in the solid state.

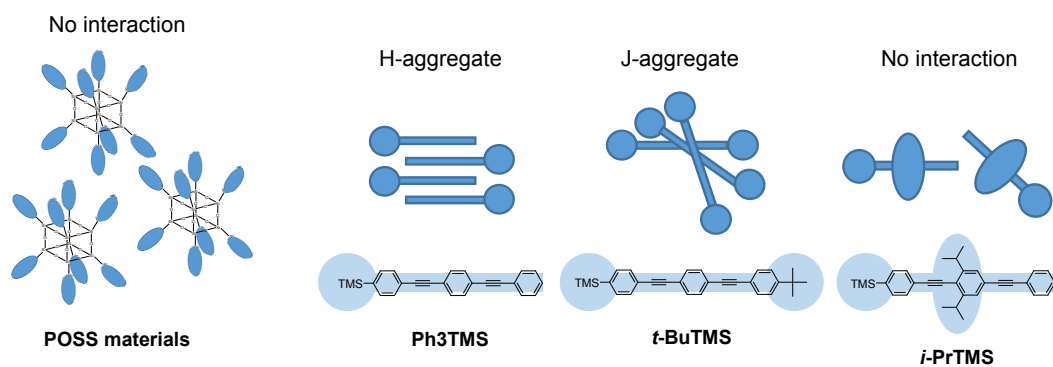

**Figure S26.** POSS materials and model compounds in a solid state.

**Figures of the thermal stability of luminescence**

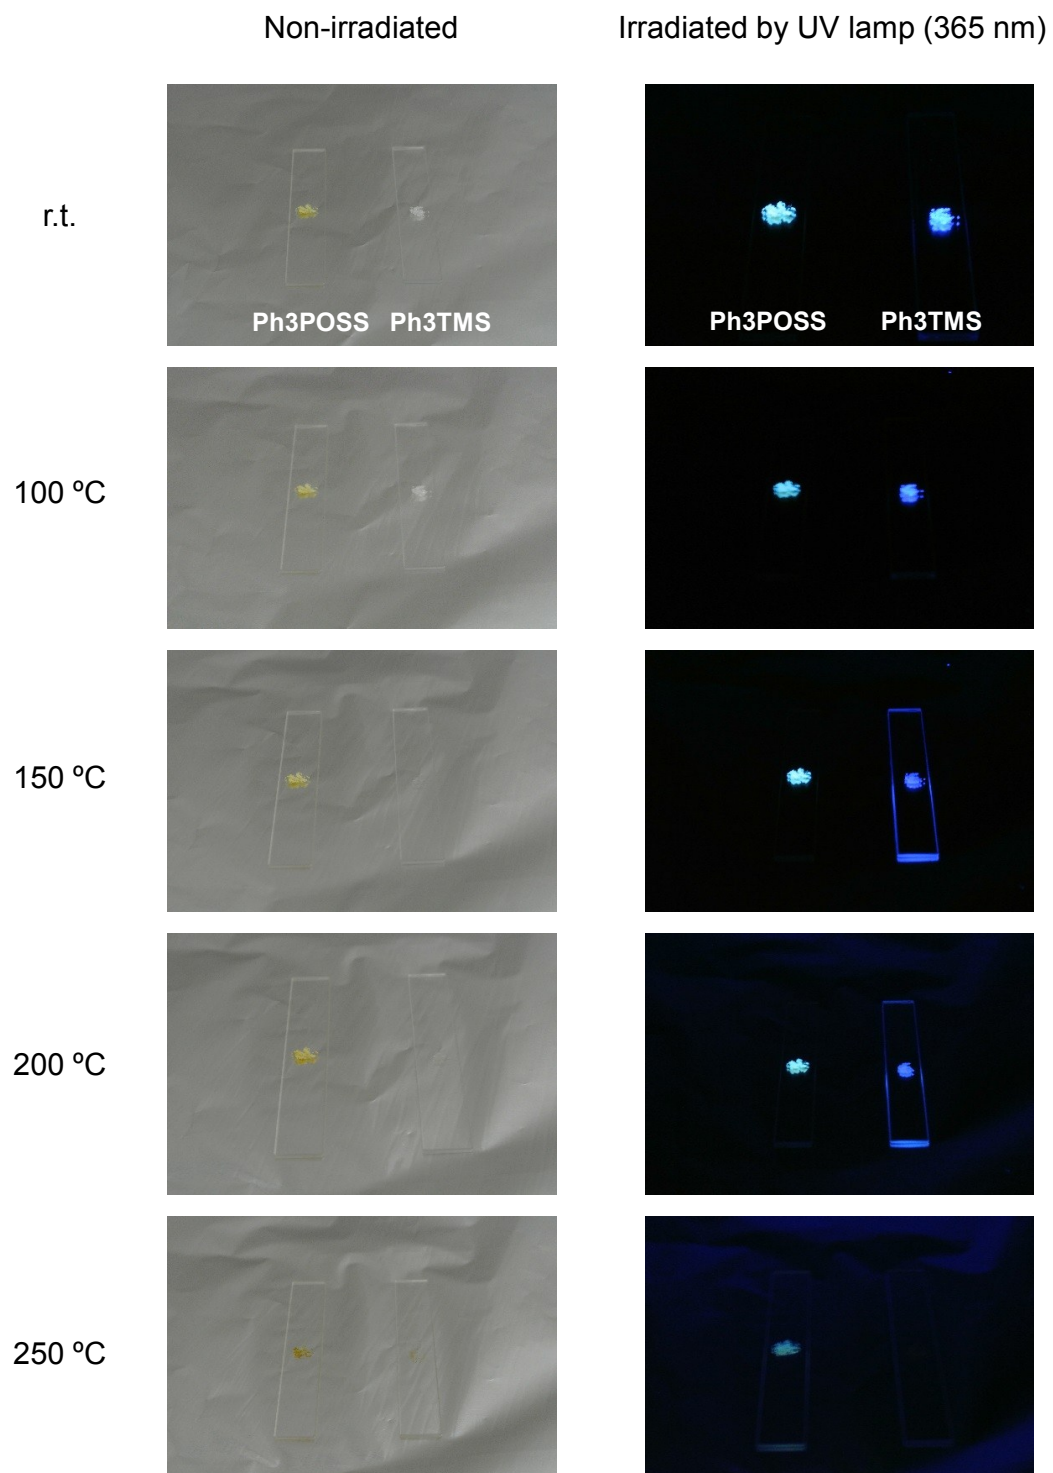

**Figure S27.** Pictures of **Ph3POSS** and **Ph3TMS** on a hotplate.



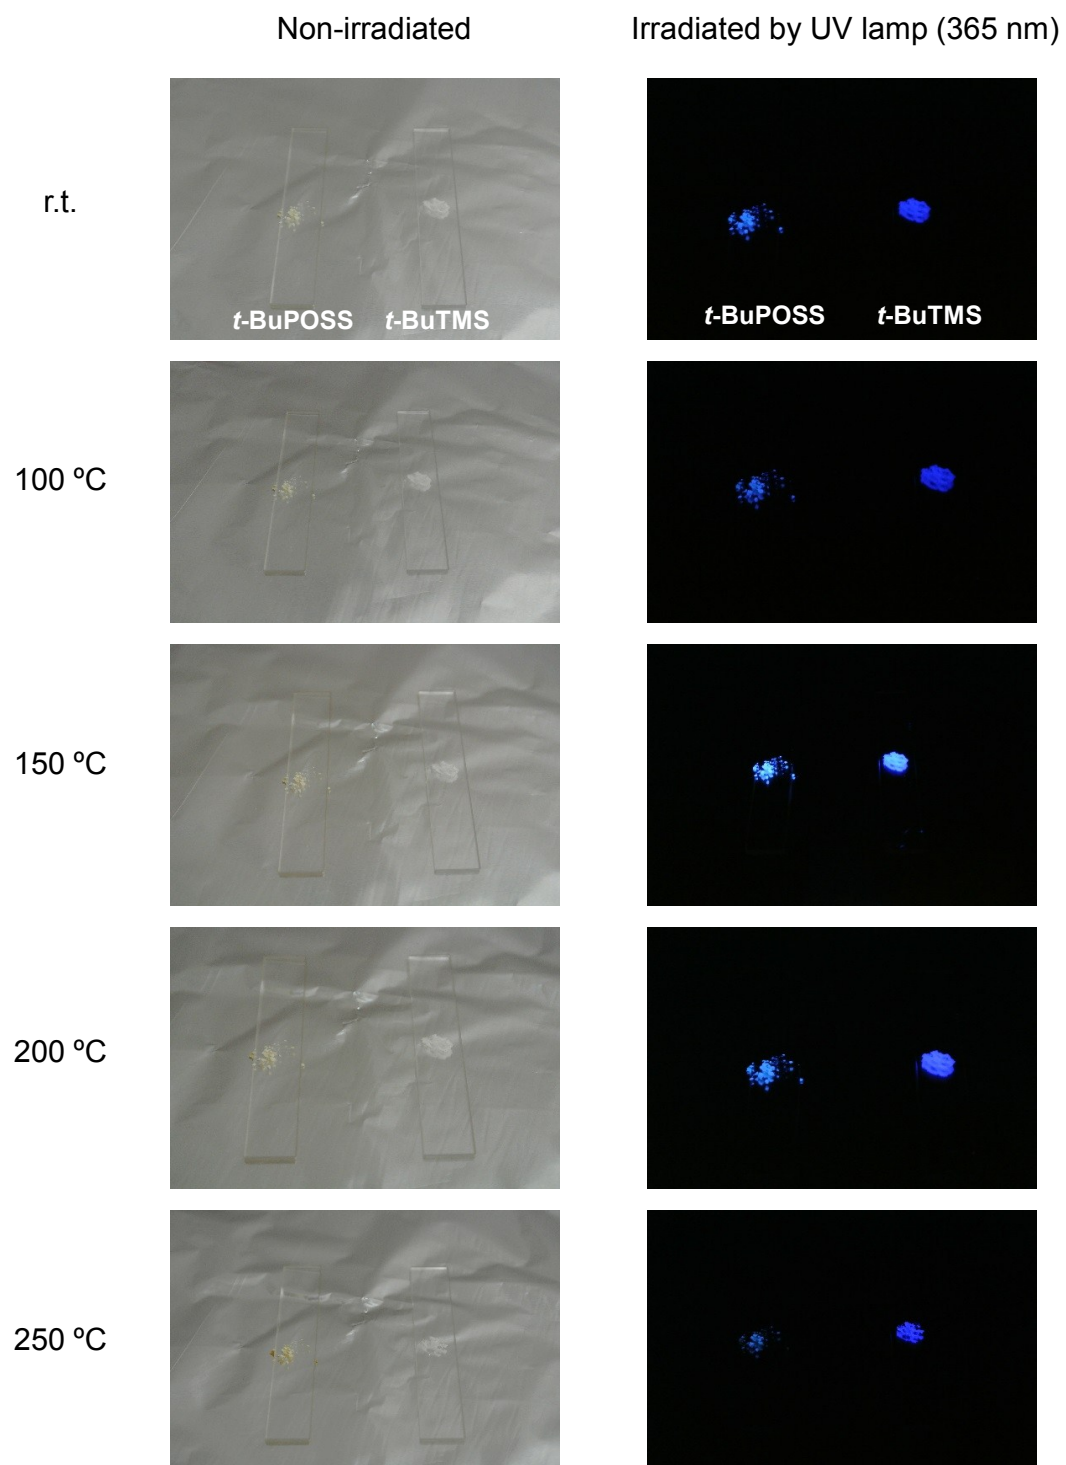

**Figure S28.** Pictures of *t*-BuPOSS and *t*-BuTMS on a hotplate.

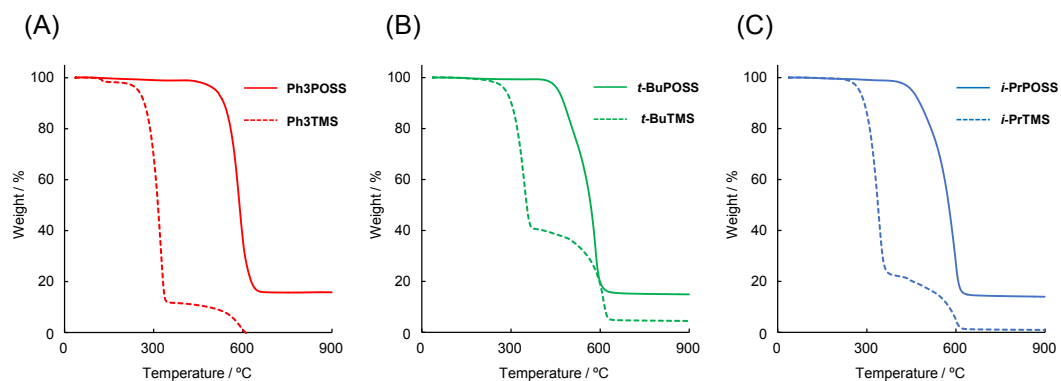

**Figure S29.** TGA curves of (A) **Ph3POSS** and **Ph3TMS**, (B) ***t*-BuPOSS** and ***t*-BuTMS**, and (C) ***i*-PrPOSS** and ***i*-PrTMS** under air (scan rate, 10 °C min<sup>-1</sup>).

**Table S1.** Thermal degradation temperatures of the compounds<sup>a</sup>

| Compd.                 | $T_d$ / °C |
|------------------------|------------|
| <b>Ph3POSS</b>         | 505        |
| <b><i>t</i>-BuPOSS</b> | 446        |
| <b><i>i</i>-PrPOSS</b> | 444        |
| <b>Ph3TMS</b>          | 252        |
| <b><i>t</i>-BuTMS</b>  | 281        |
| <b><i>i</i>-PrTMS</b>  | 272        |

<sup>a</sup> Determined from TGA profiles at the onset of degradation in the profile with temperature increase rate of 10 °C·min<sup>-1</sup> in air.

## References

1. S. P. Jagtap, S. Mukhopadhyay, V. Coropceanu, G. L. Brizius, J.-L. Brédas and D. M. Collard, *J. Am. Chem. Soc.*, 2012, **134**, 7176–7185.
2. M. F. Roll, M. Z. Asuncion, J. Kampf and R. M. Laine, *ACS Nano*, 2008, **2**, 320–326.
3. J. E. Rogers, T. M. Cooper, P. A. Fleitz, D. J. Glass and D. G. J. McLean, *Phys Chem A*, 2002, **106**, 10108–10115.
4. H. Yang, G. Li, Z. Ma, J. Chao and Z. GuO, *J. Catal.*, 2010, **276**, 123–133.
